# Supplementary material for: The Long-Acting Serine Protease Inhibitor mPEG-SPA-MDSPI16 Alleviates LPS-Induced Acute Lung Injury
Source: MDPI journal article supplement (doi:10.3390/ijms25084567), 2024-04-22
Supplement: s1 [file s1]

Article

# The long-acting serine protease inhibitor mPEG-SPA-MDSPI16 alleviates LPS-induced acute lung injury

## Supplementary Figure

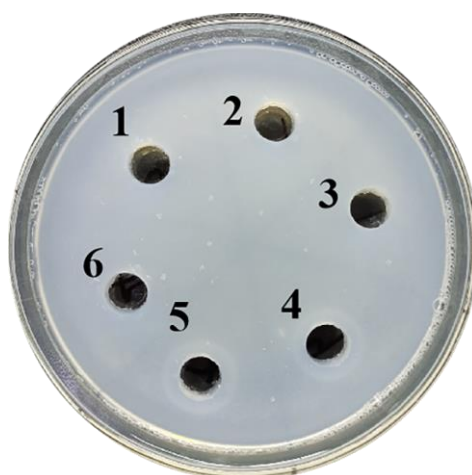

**Figure S1.** mPEG-SPA-MDSPI16 inhibited elastase activity. 1 MDSPI16+Elastase. 2 mPEG-SPA-MDSPI16+Elastase. 3 Sivelestat+Elastase. 4 Elastase. 5 mPEG-SPA+Elastase. 6 mPEG-SPA.

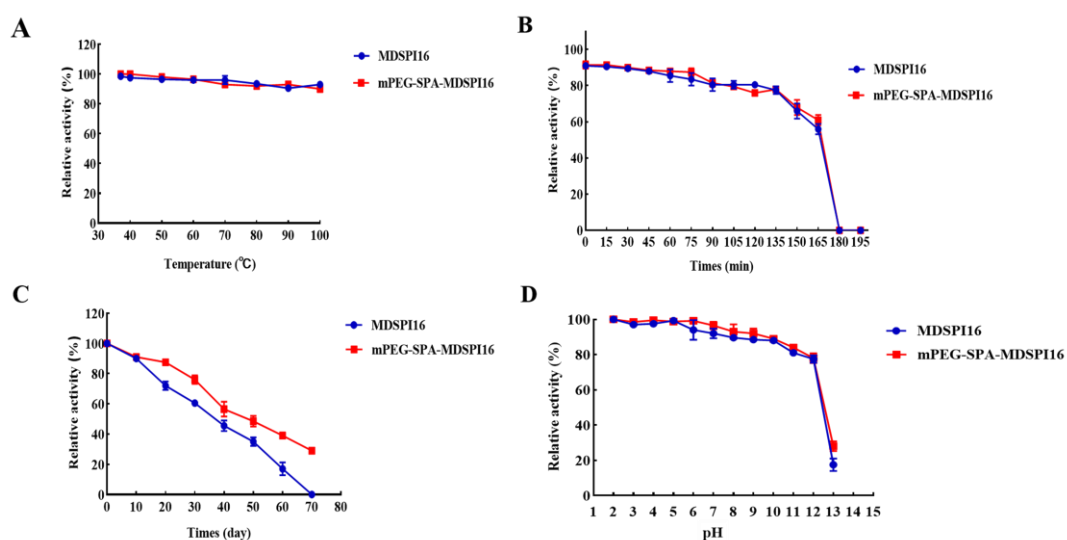

**Figure S2.** Stability analysis of mPEG-SPA-MDSPI16. (A, B and C) Temperature stability. (D) pH stability. Graphs show mean of three biological replicates, p-values were determined using an unpaired two-tailed Student's t-test.

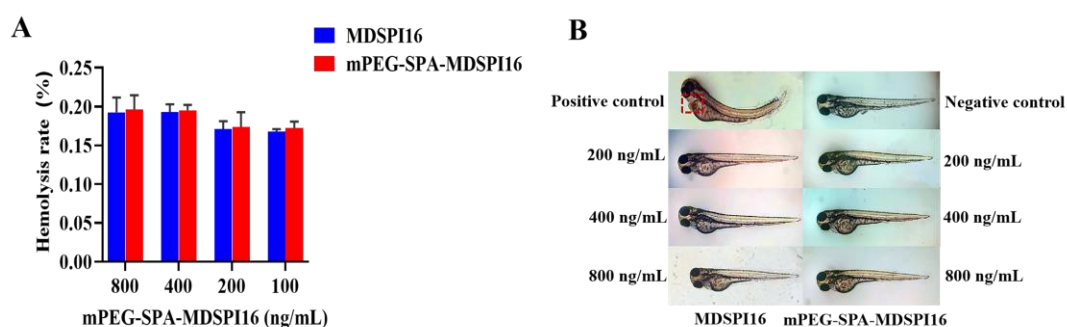

**Figure S3.** Determination of hemolytic activity and embryotoxicity. (A) Determination of hemolytic activity of mPEG-SPA-MDSP116. (B) Embryotoxicity test results of mPEG-SPA-MDSP116. Graphs show mean of three biological replicates, p-values were determined using an unpaired two-tailed Student's t-test.

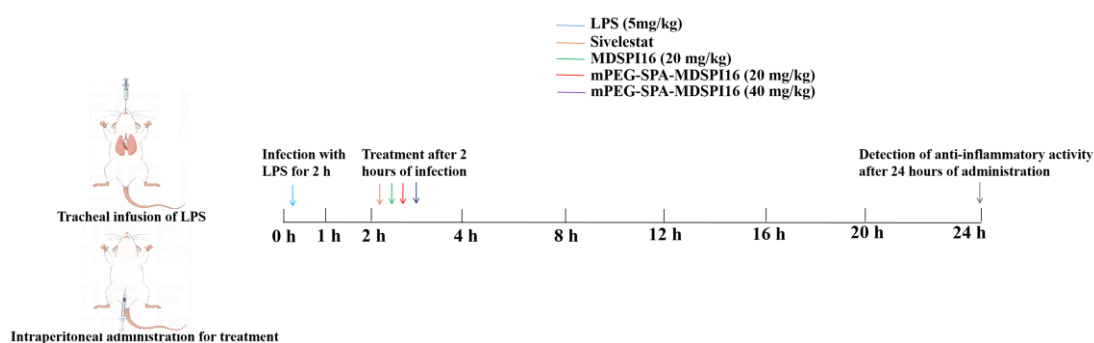

**Figure S4.** The experimental schematic of acute lung injury in mice. n = 20/group.

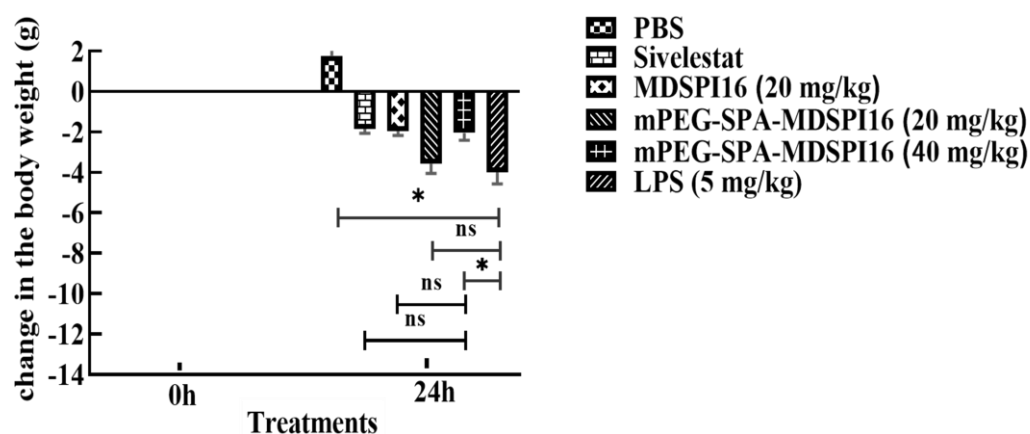

**Figure S5.** mPEG-SPA-MDSP116 improved LPS-induced weight loss in Mice. Data represented as Mean  $\pm$  SEM, n = 20/group. \*  $p < 0.05$ , ns,  $p > 0.05$  vs. the LPS-treated group; ns,  $p > 0.05$  vs. the mPEG-SPA-MDSP116(40 mg/kg) treatment group. P-values were determined using an unpaired two-tailed Student's t-test.

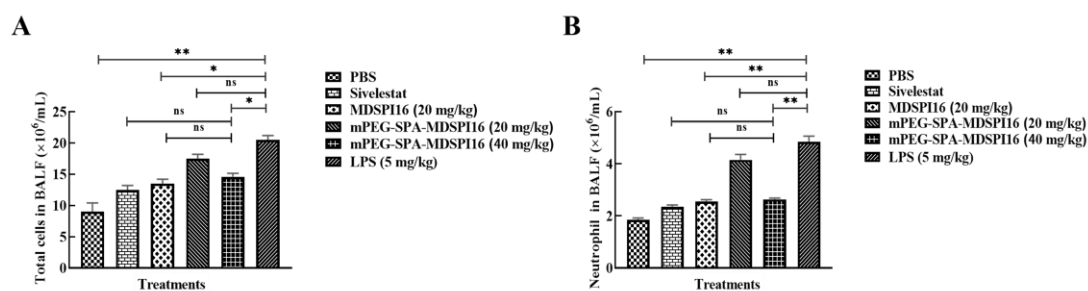

**Figure S6.** Cell count in mouse BALF. (A) Total cells in BALF. (B) Neutrophils in BALF. Data represented as Mean  $\pm$  SEM,  $n = 20/\text{group}$ . \*  $p < 0.05$ , \*\*  $p < 0.01$ , ns,  $p > 0.05$  vs. the LPS-treated group; ns,  $p > 0.05$  vs. the mPEG-SPA-MDSPA16(40 mg/kg) treatment group. P-values were determined using an unpaired two-tailed Student's  $t$ -test.

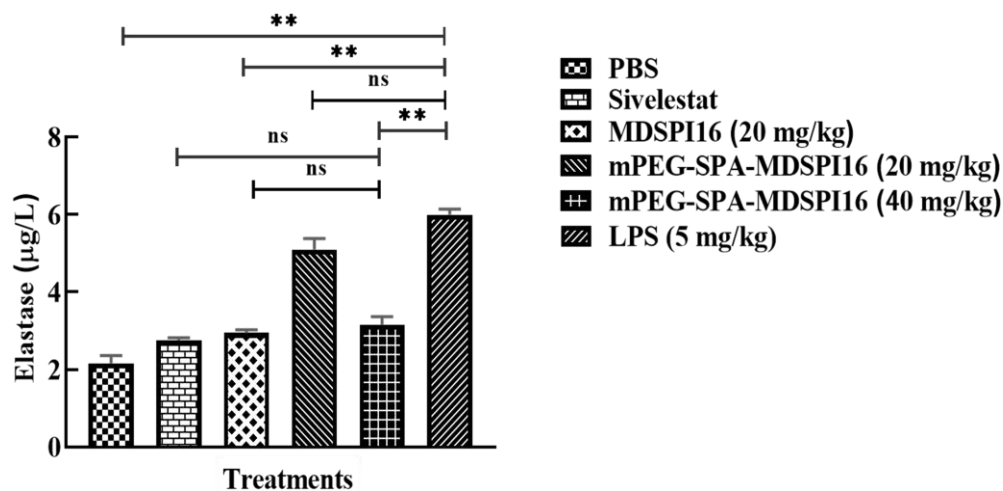

**Figure S7.** mPEG-SPA-MDSPA16 inhibited the expression of neutrophil elastase in mouse BALF. Data represented as Mean  $\pm$  SEM,  $n = 20/\text{group}$ . \*\*  $p < 0.01$ , ns,  $p > 0.05$  vs. the LPS-treated group; ns,  $p > 0.05$  vs. the mPEG-SPA-MDSPA16(40 mg/kg) treatment group. P-values were determined using an unpaired two-tailed Student's  $t$ -test.

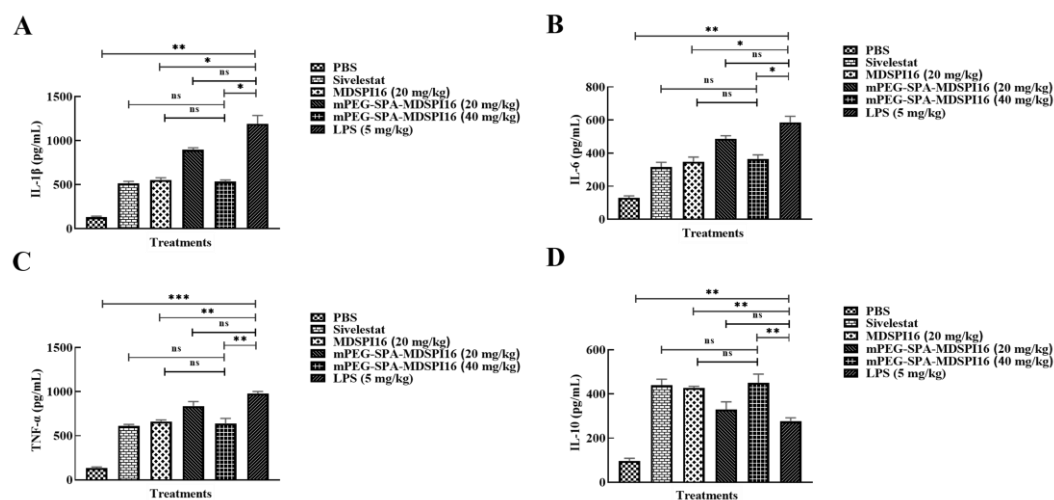

**Figure S8.** mPEG-SPA-MDSP16 attenuated the LPS induced inflammatory cytokines in BALF samples. mPEG-SPA-MDSP16 treatment inhibited the (A) IL-1 $\beta$ , (B) IL-6 and (C) TNF- $\alpha$  level in mice BALF. (D) mPEG-SPA-MDSP16 treatment can increase the level of IL-10 in mice BALF. Data represented as Mean  $\pm$  SEM,  $n = 20$ /group. \*  $p < 0.05$ , \*\*  $p < 0.01$ , \*\*\*  $p < 0.001$ , ns,  $p > 0.05$  vs. the LPS-treated group; ns,  $p > 0.05$  vs. the mPEG-SPA-MDSP16(40 mg/kg) treatment group. P-values were determined using an unpaired two-tailed Student's t-test.

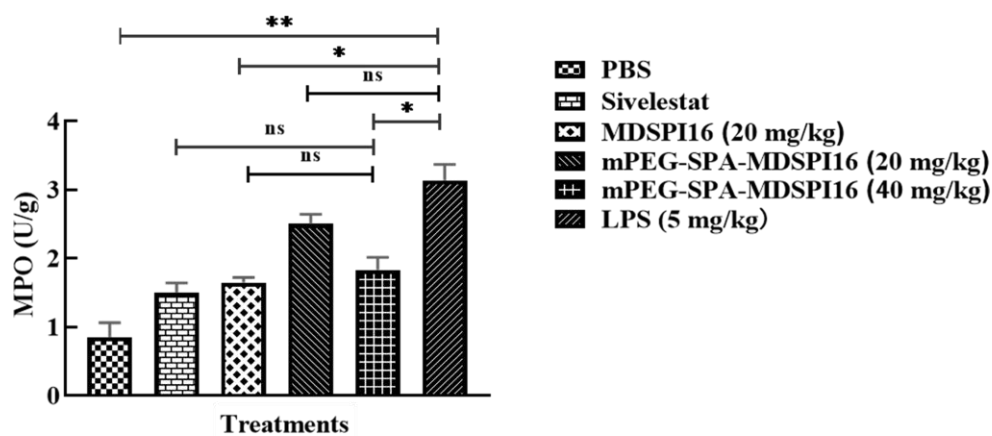

**Figure S9.** Quantification of MPO activity in lung tissue of ALI mice. Data represented as Mean  $\pm$  SEM,  $n = 20$ /group. \*  $p < 0.05$ , \*\*  $p < 0.01$ , ns,  $p > 0.05$  vs. the LPS-treated group; ns,  $p > 0.05$  vs. the mPEG-SPA-MDSP16(40 mg/kg) treatment group. P-values were determined using an unpaired two-tailed Student's t-test.

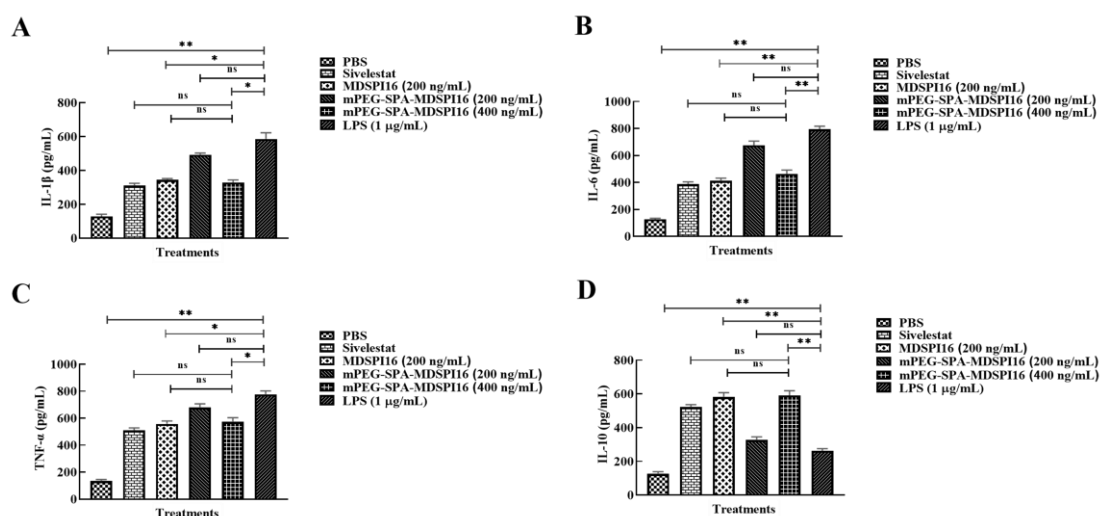

**Figure S10.** mPEG-SPA-MDSPA16 reduces the inflammatory cytokine levels secreted by LPS-induced neutrophils. The cells were induced by LPS, and then cultured at different concentrations of mPEG-SPA-MDSPA16 (200, 400ng/mL). The supernatant was collected and detected by ELISA for(A) IL-1 $\beta$ , (B) IL-6, (C) TNF- $\alpha$  and (D) IL-10. Data represented as Mean  $\pm$  SEM,  $n = 10$ /group. \*  $p < 0.05$ , \*\*  $p < 0.01$ , ns,  $p > 0.05$  vs. the LPS-treated group; ns,  $p > 0.05$  vs. the mPEG-SPA-MDSPA16(400 ng/mL) treatment group. P-values were determined using an unpaired two-tailed Student' s t-test.

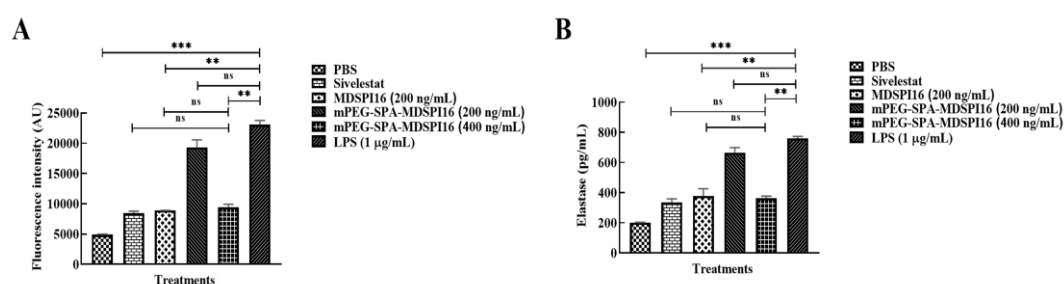

**Figure S11.** The produced level of ROS and neutrophil elastase by LPS-induced neutrophils. (A)The level of ROS produced by LPS-induced neutrophils. (B) Effect of mPEG-SPA-MDSPA16 on expression of neutrophil elastase in mice. Data represented as Mean  $\pm$  SEM,  $n = 10$ /group. \*\*  $p < 0.01$ , \*\*\*  $p < 0.001$ , ns,  $p > 0.05$  vs. the LPS-treated group; ns,  $p > 0.05$  vs. the mPEG-SPA-MDSPA16(400 ng/mL) treatment group. P-values were determined using an unpaired two-tailed Student' s t-test.

## Supplementary Table

**Table S1** Pharmacokinetic parameters of MDSP16 after subcutaneous administration in rats

| Parameter          | Quantitative value | Unit                   |
|--------------------|--------------------|------------------------|
| AUC <sub>0-t</sub> | 86564              | ng•mL <sup>-1</sup> *h |
| AUC <sub>0-∞</sub> | 93738              | ng•mL <sup>-1</sup> *h |
| MRT <sub>0-t</sub> | 3.62               | h                      |
| T <sub>1/2β</sub>  | 1.79               | h                      |
| CL                 | 4.44               | min/(mL*kg)            |
| V                  | 0.688              | L/kg                   |

**Table S2** Pharmacokinetic parameters of MDSP16 after intramuscular administration in rats

| Parameter          | Quantitative value | Unit                   |
|--------------------|--------------------|------------------------|
| AUC <sub>0-t</sub> | 94380              | ng•mL <sup>-1</sup> *h |
| AUC <sub>0-∞</sub> | 129115             | ng•mL <sup>-1</sup> *h |
| MRT <sub>0-t</sub> | 6.12               | h                      |
| T <sub>1/2β</sub>  | 4.08               | h                      |
| CL                 | 3.23               | min/(mL*kg)            |
| V                  | 1.14               | L/kg                   |

**Table S3** Pharmacokinetic parameters of MDSP16 and mPEG-SPA-MDSP16 after intravenous administration in rats

| Parameter          | MDSP16 | mPEG-SPA-MDSP16 | Unit                   |
|--------------------|--------|-----------------|------------------------|
| AUC <sub>0-t</sub> | 160233 | 945242.45       | ng•mL <sup>-1</sup> *h |
| AUC <sub>0-∞</sub> | 169861 | 1615026.5       | ng•mL <sup>-1</sup> *h |
| MRT <sub>0-t</sub> | 1.57   | 2.84            | h                      |
| T <sub>1/2β</sub>  | 1.79   | 7.17            | h                      |
| CL                 | 4.44   | 12              | min/(mL*kg)            |
| V                  | 0.231  | 0.128           | ng/mL                  |

**Table S4** Real-Time PCR primer sequences

| Gene           | Primer sequence (5'–3')                                                |
|----------------|------------------------------------------------------------------------|
| IL-10          | F: 5'-GCCAGAGCCACATGCTCCTA-3'<br>R: 5'-GATAAGGCTTGGCAACCCAAGTAA-3'     |
| IL-6           | F: 5'-CCACTTCACAAGTCGGAGGCTTA-3'<br>R: 5'-CCAGTTTGGTAGCATCCATCATTTC-3' |
| iNOS           | F: 5'-TGCCACGGACGAGACGGATAG-3'<br>R: 5'-CTCTTCAAGCACCTCCAGGAACG-3'     |
| COX-2          | F: 5'-ATTCCAAACCAGCAGACTCATA-3'<br>R: 5'-CTTGAGTTTGAAGTGGTAACCG-3'     |
| IL-1 $\beta$   | F: 5'-TCCAGGATGAGGACATGAGCAC-3'<br>R: 5'-GAACGTCACACACCAGCAGGTTA-3'    |
| TNF- $\alpha$  | F: 5'-CCTATGTCTCAGCCTCTTCTCAT-3'<br>R: 5'-CACTTGGTGGTTTGCTACGA-3'      |
| $\beta$ -actin | F: 5'-AAATGGTGAAGGTCGGTGTGAAC-3'<br>R: 5'-CAACAATCTCCACTTTGCCACTG-3'   |
